# Supplementary material for: APCFZR1 prevents nondisjunction in mouse oocytes by controlling meiotic spindle assembly timing
Source: PubMed Central journal article supplement — Mol Biol Cell. 2012 Oct 15;23(20):3970–81. doi: 10.1091/mbc.E12-05-0352 (PMC3469513; doi:10.1091/mbc.e12-05-0352), 2012-10-15
Supplement: supp_E12-05-0352_CombinedSupMats.pdf [file supp_E12-05-0352_CombinedSupMats.pdf]

**A**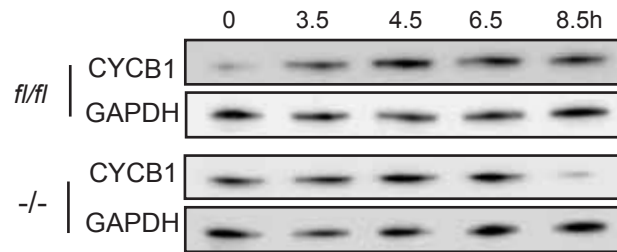**B**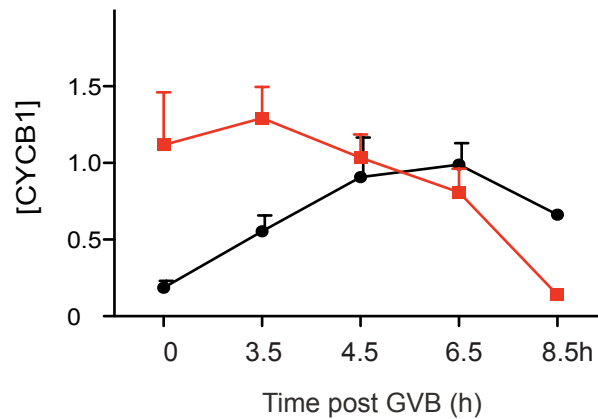

**Figure S1.** Degradation of endogenous cyclin B1 is accelerated in *Fzr1<sup>-/-</sup>* oocytes. (A) Samples of 50 oocytes were immunoblotted for cyclinB1 and GAPDH at the times indicated post GVB. Shown is a representative blot from 2 separate experiments. (B) Densitometric analysis of levels of cyclinB1, normalized to GAPDH from immunoblots represented in (A) Data points represent the mean from 2 separate experiments, error bars show s.d.
